# Supplementary material
Source: PubMed Central journal article supplement (PMC2997674)
Supplement: NIHMS252811-supplement-Supp_Figure_1.pdf [file NIHMS252811-supplement-Supp_Figure_1.pdf]

# Suppl. Figure 1

## A

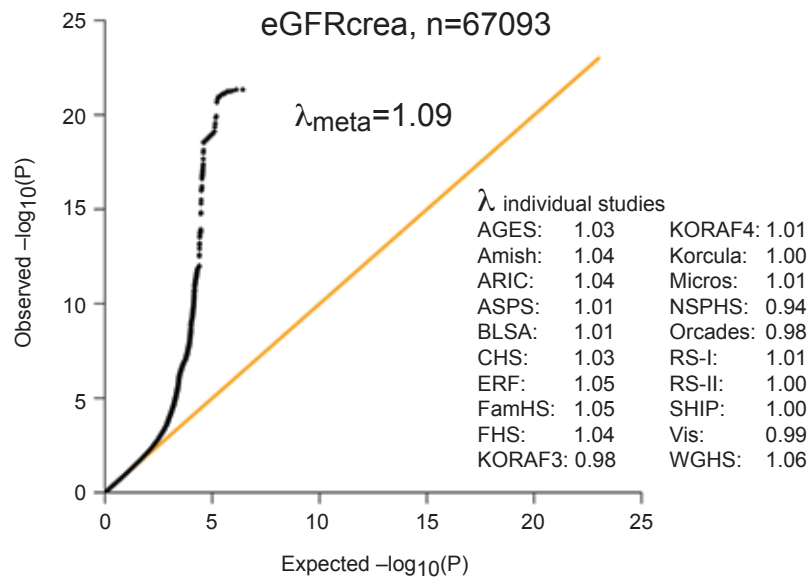

## B

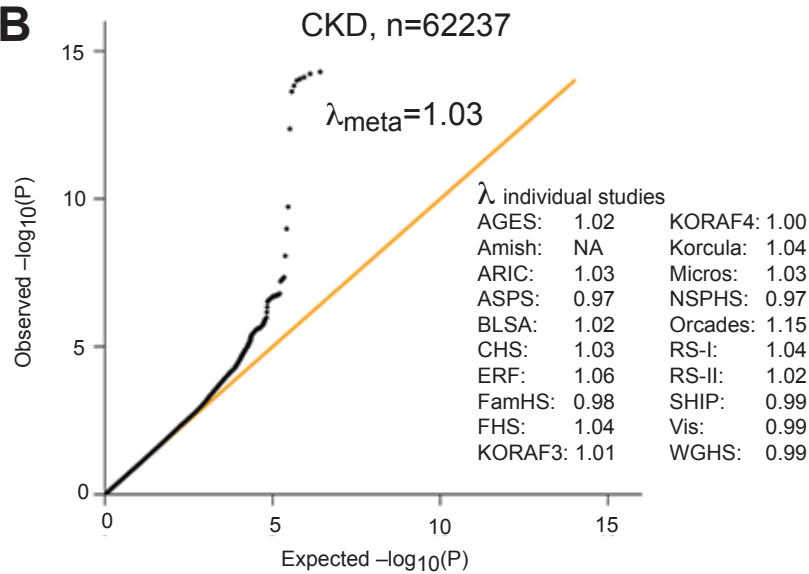

## C

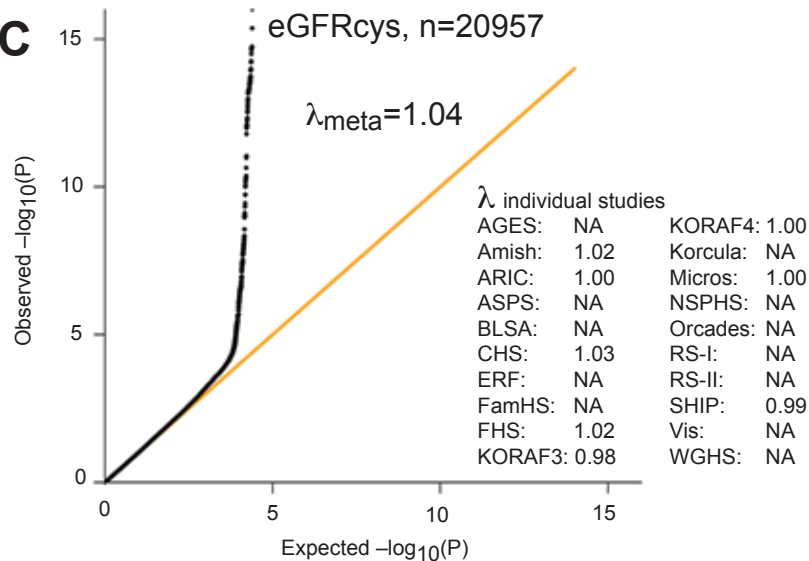

$\lambda_{\text{meta}}$  represents the genomic control parameters after discovery meta-analysis, and the  $\lambda$  for the individuals studies is reported next to each trait. The graphs present p-values corrected for inflation at the study-specific level before meta-analysis as well as after meta-analysis for the meta-analysis genomic control parameter. No correction was applied to data from studies with  $\lambda < 1$ . The graph for eGFRcys is cut off; all SNPs with lower p-values are located at the *CST* locus on chromosome 20. NA denotes phenotype unavailability. Black: results from meta-analysis, orange: null hypothesis.
